# Supplementary material
Source: publisher figshare collection journal article supplement (https://karger.figshare.com/ndownloader/files/27948804)
Supplement: Supplementary file 1 [file 27948804]

**Supplementary Table S6.** Number of chromosomes and ManDra-A 5 repeat and ManDra-B FISH signals detected in the somatic cells of clonal dojo loach.

| Group | Number of signals |  | Number of chromosomes | | | | Total |
| --- | --- | --- | --- | --- | --- | --- | --- |
| ManDra-A 5 repeat － ManDra-B |  | 47 | 48 | 49 | 50 |
| Clone | 12－25 |  |  | 1 | 1 | 87 | 89 |
|  | 12－24 |  | 1 | 4 | 5 | 2 | 12 |
|  | 12－23 |  |  | 4 |  | 1 | 5 |
|  | 12－22 |  | 1 |  |  |  | 1 |
|  | 11－25 |  |  | 1 | 3 | 1 | 5 |
|  | 11－24 |  |  | 5 |  |  | 5 |
|  |  | Total | 2 | 15 | 9 | 91 | 117 |
|  |  |  |  |  |  |  |  |
